# Supplementary material for: Visual Object Multimodality Tracking Based on Correlation Filters for Edge Computing
Source: Hindawi journal article supplement (doi:10.1155/2020/8891035), 2020-12-10
Supplement: f1 [file 8891035.f1.docx]

### Supplementary experiment

1) Influence of different size of searching window

For example, we take and analysis the results as S1.


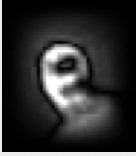

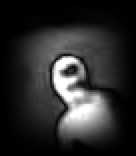


(a) feature extracted from 2x (b) feature extracted from 3x


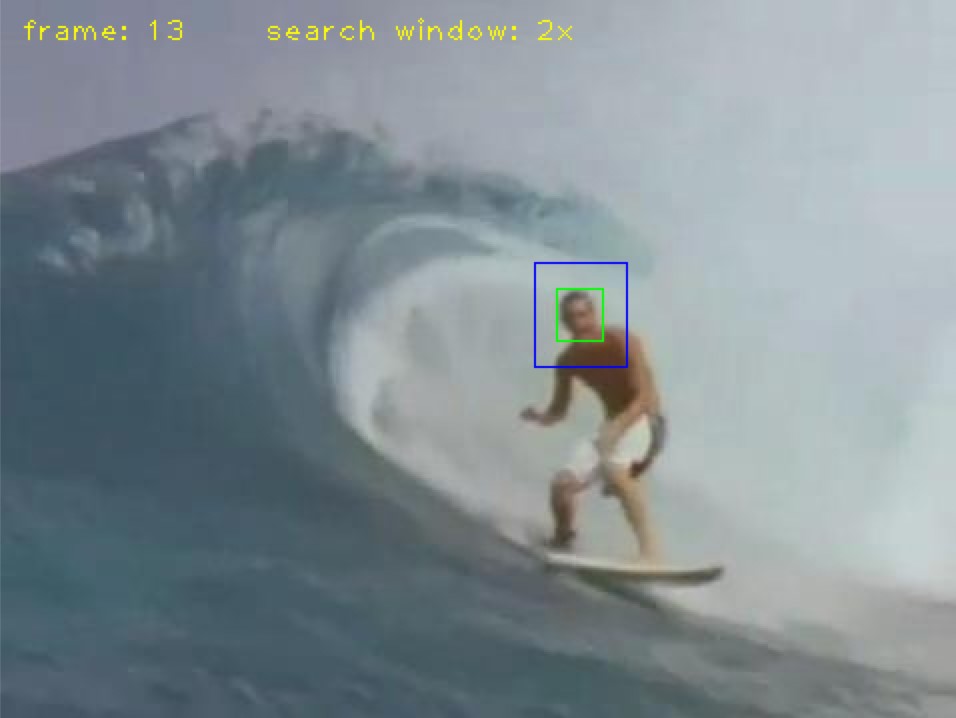

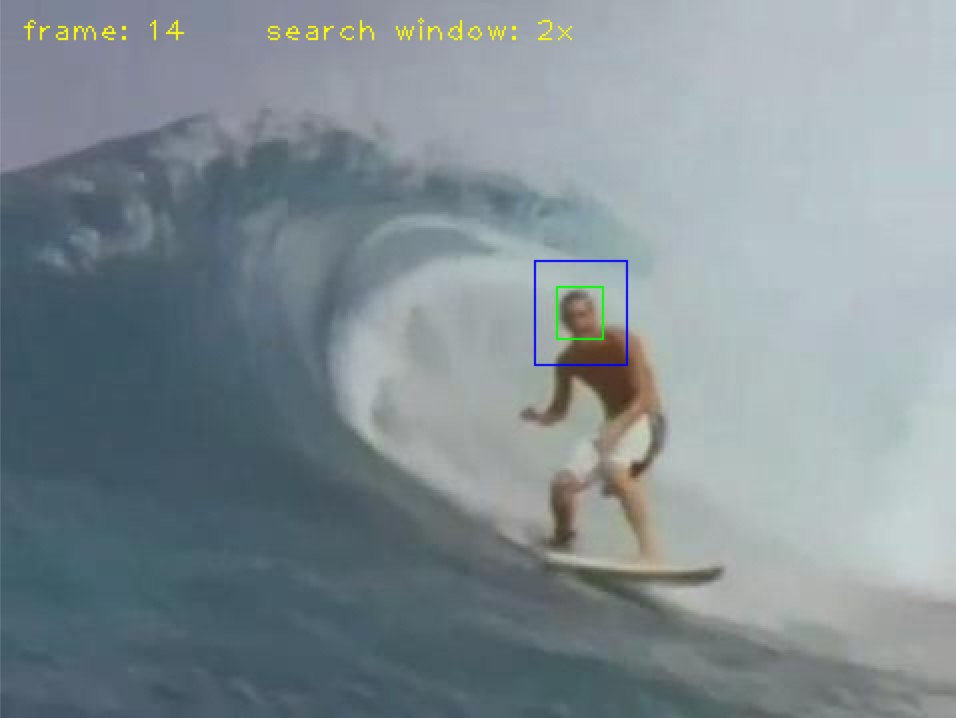


(c) 13*th* frame, success, 2x (d) 14*th* frame, success, 2x


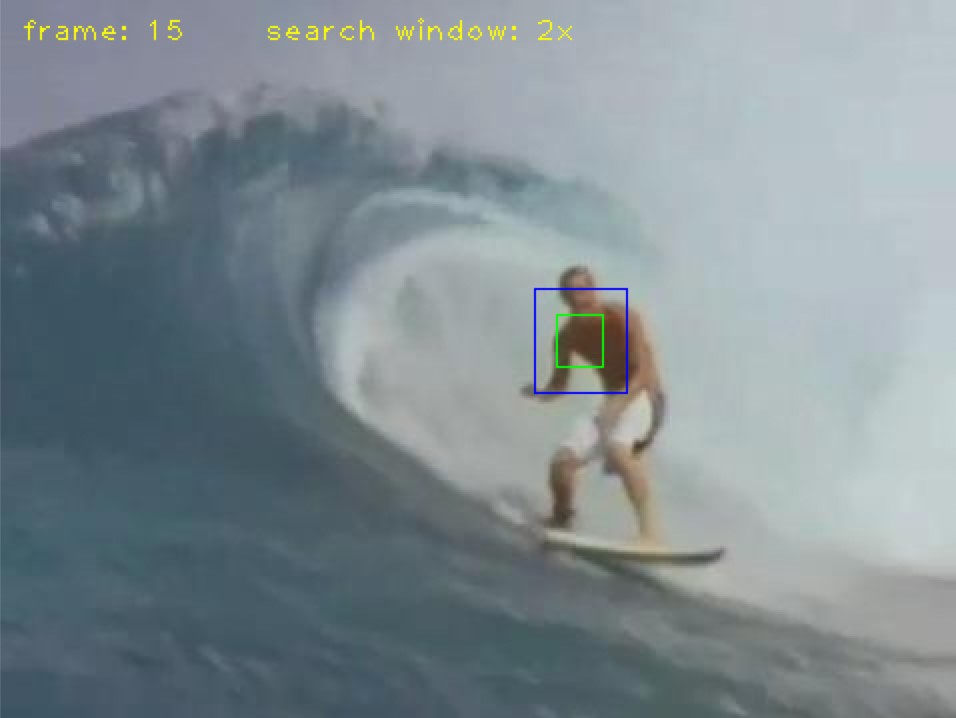

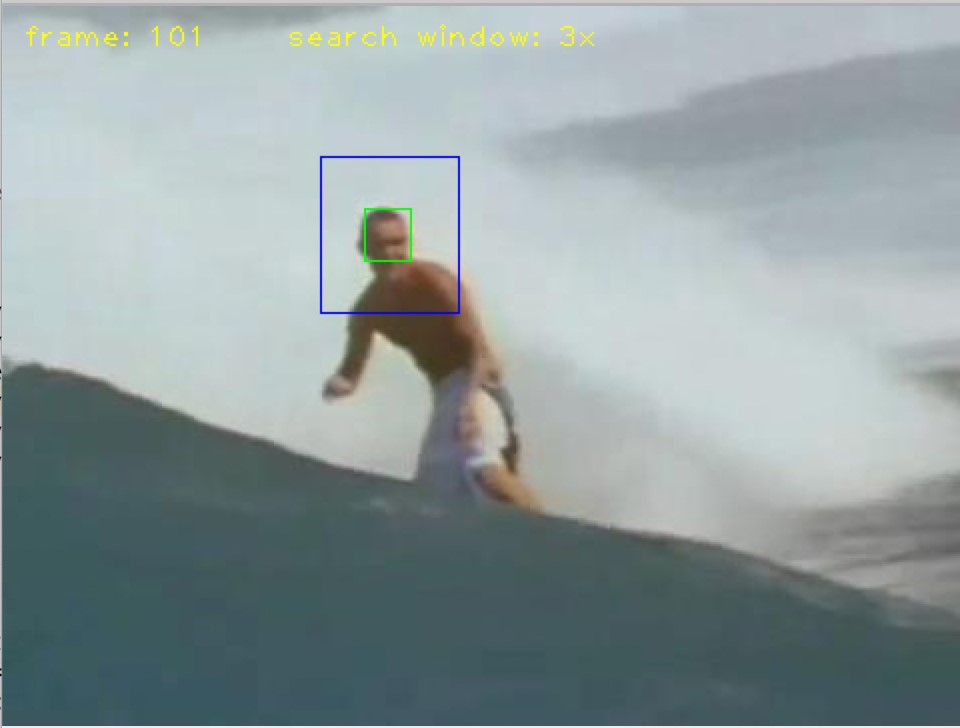


(e) 15*th* frame, fail, 2x (f) 101*th* frame, success, 3x

S1: The tracking results with different . The green rectangle represents the and the blue is times as big as . Tracking failure happens when using 2x and tracking is stable when using 3x.

As figure shows, the 2x search window cause the tracker failed in 15th frame. And a 3x search window makes the tracker behave well. The key is that the tracker needs to extract the target feature and some marginal feature around the target is weakened. To leverage computation cost and tracking quality, we use 2x search window and extract more stable feature instead of intensity to ensure the well performance.

2) 1-dimentional correlation rotation tracking

As S2 shows, in one frame, we crop a series of image patches using different rotation angles . And then extract feature map for each image. Those feature maps can be transformed to feature vectors one by one by concatenate its elements. And a feature matrix are comprised of those vectors. Use it to train a rotation correlation filter . In next frames, we extract feature matrix using same method and correlate it with . The maximum response position is the predicted angle.


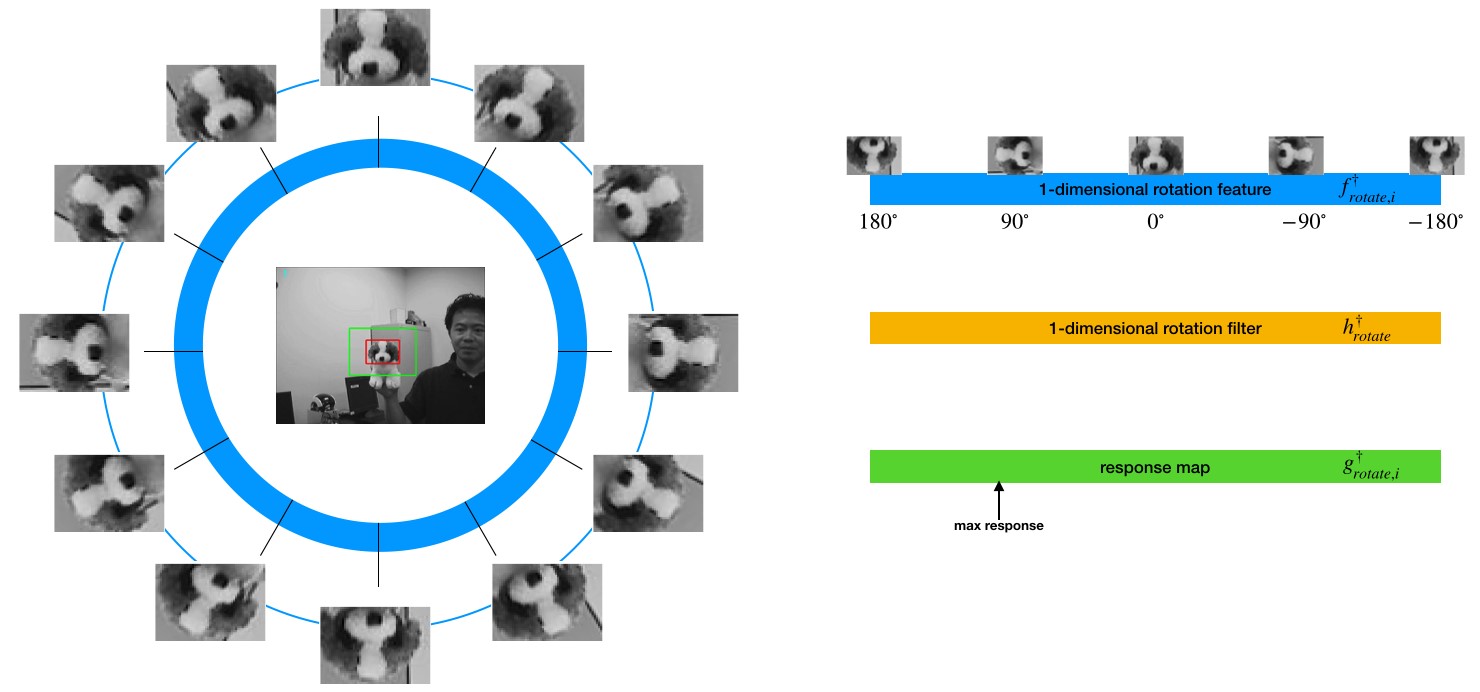


S2 1-dimentional correlation rotation tracking,

But extracting from different rotation angle regions is very time consuming. When , the number of image patches is . Experiments show that the average frame rate of the new tracker is about 16 fps. But this method is robust because it handles the image patches as a whole and it doesn't ignore the relationship between image patches like the above "exhaustive rotation tracking" method. And when is getting smaller and smaller, the accuracy of rotation tracking is increasing and the frame rate is decreasing for exchange.

### Supplementary description

Influence of different size of searching window and analysis the results as S1. S2 1-dimentional correlation rotation tracking,
